# Supplementary material for: Anti-inflammatory T-cell shift in neuropathic pain
Source: Springer Nature journal article supplement (doi:10.1186/s12974-014-0225-0), 2015-01-01

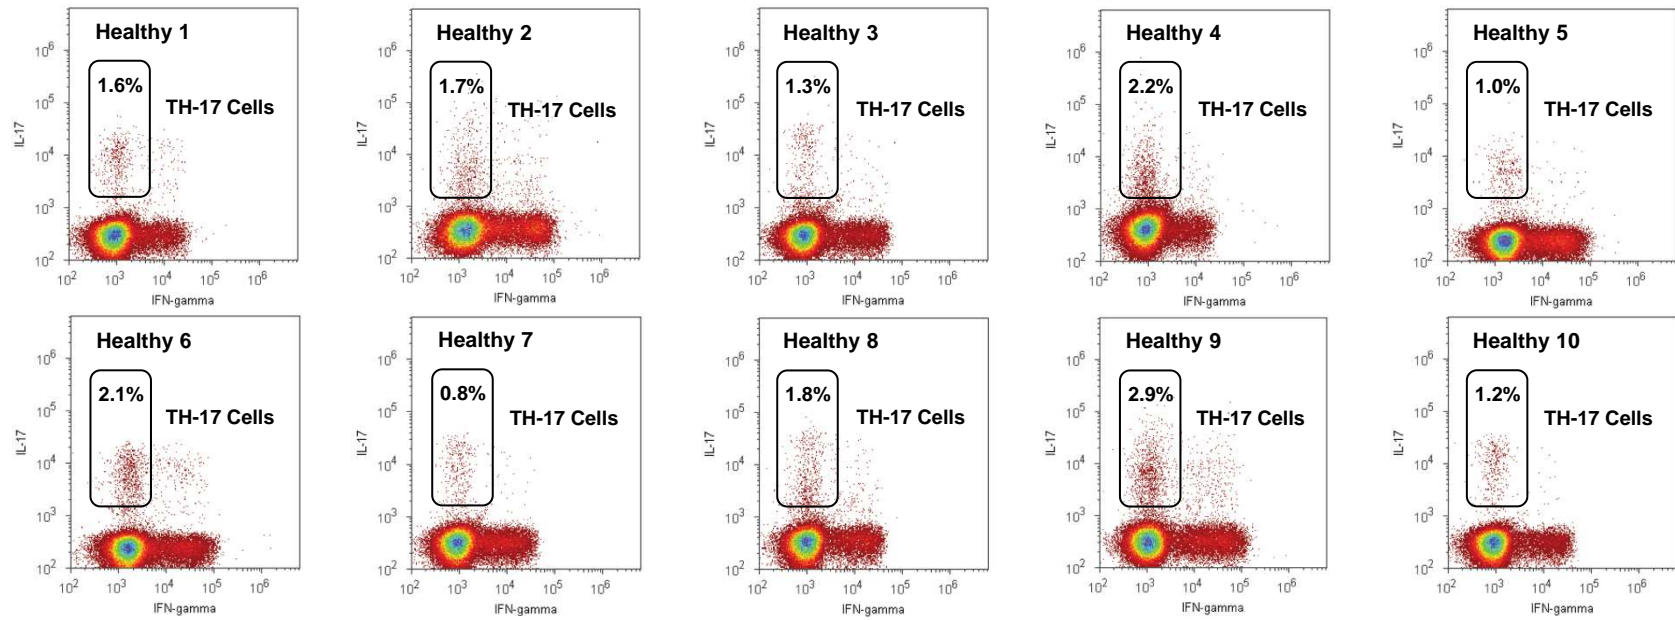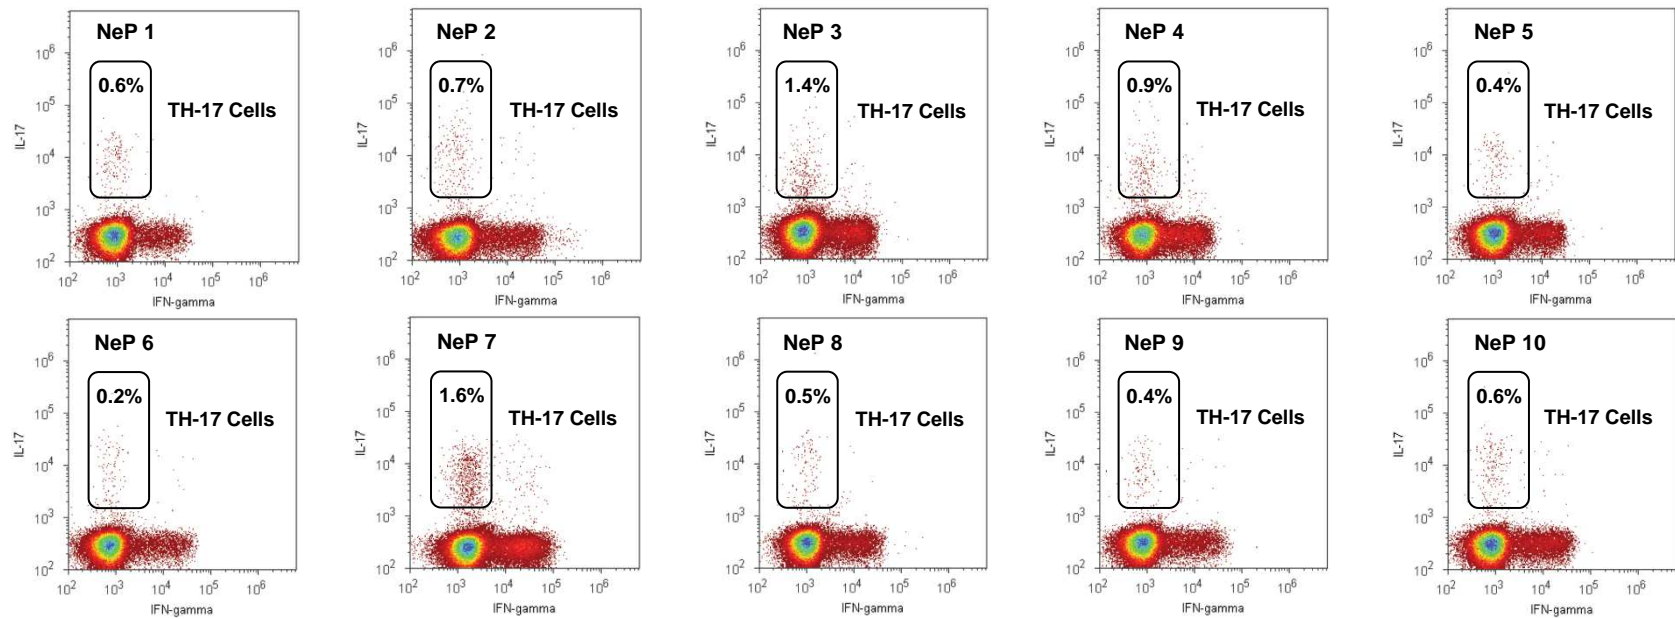

Supplement: MOESM1 [file 9768506]
